# Supplementary material for: Optimal Serum 25(OH)D Levels and Vitamin D Intake in Korean Postmenopausal Women
Source: MDPI journal article supplement (doi:10.3390/nu15081856), 2023-04-12
Supplement: s1 [file s1]

(A)

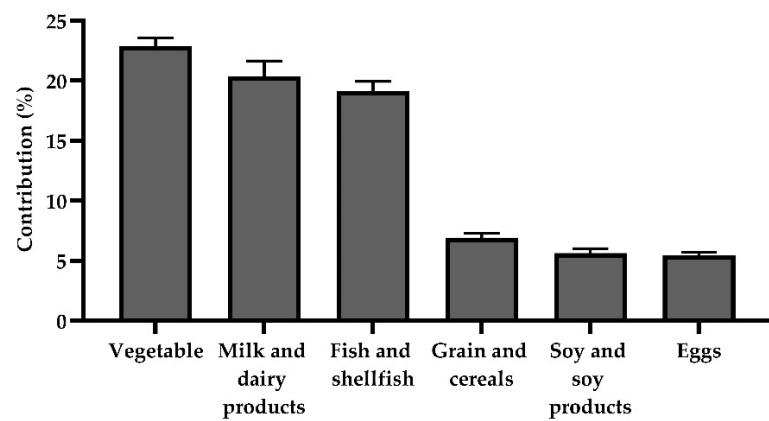

(B)

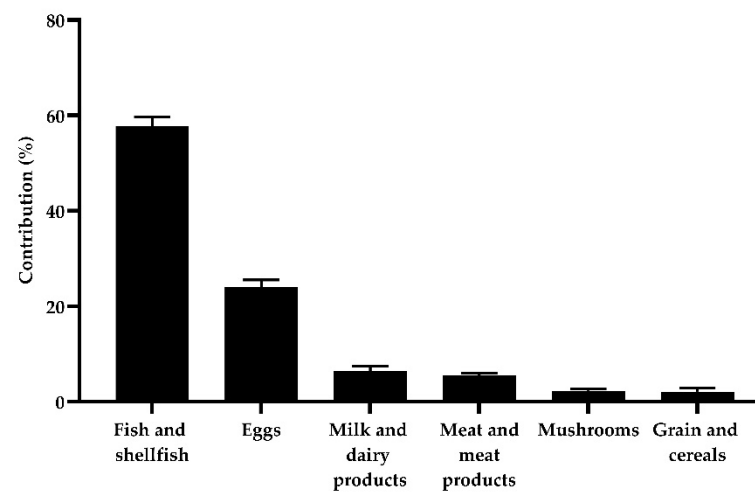

Figure S1. Contribution of calcium (A) and vitamin D (B) intake by food source. Mean  $\pm$  S.E. Only the top 6 food groups for each nutrient are presented.
